# Supplementary material
Source: MDPI journal article supplement (https://www.mdpi.com/2673-6772/2/3/17)
Supplement: s1 [file s1]

**Table S1.** Univariate analyses of the association between risk factors and flock-level seropositivity of *T. gondii* and *C. abortus* infections on small ruminant farms in the northern regions of Cameroon (Adamawa, North and Far North).

| Variables                          |              | N   | <i>T. gondii</i>    |                    |        | <i>C. abortus</i>   |                    |         |
|------------------------------------|--------------|-----|---------------------|--------------------|--------|---------------------|--------------------|---------|
|                                    |              |     | Prevalence<br>n (%) | OR (95 % CI)       | Pvalue | Prevalence<br>n (%) | 95 % CI            | Pvalue  |
| Regions                            | Adamawa      | 50  | 23 (46)             | 1.0 (Ref.)         | 0,08   | 1 (2)               | 1.0 (Ref.)         | 0.40    |
|                                    | North        | 81  | 23 (28.4)           | 0.42 (18.6 - 38.2) | 0.03*  | 4 (4.9)             | 2.5 (0.22 - 9.7)   | 0,001** |
|                                    | Far North    | 69  | 28 (40.6)           | 0.69 (29 - 52.2)   | 0.35   | 1 (1.5)             | 0,72 (0.00 - 4.3)  | 0,81    |
| Breeding objectives                | Financial    | 139 | 72 (51.8)           | 1.0 (Ref.)         | 0.00** | 5 (3.6)             | 1.0 (Ref.)         | 0.45    |
|                                    | Consumption  | 51  | 16 (31.4)           | 0.79 (18.6 - 44.1) | 0.51   | 2 (3.9)             | 1.4 (0.00 - 9.2)   | 0,65    |
|                                    | Pleasure     | 10  | 1 (10)              | 0.17 (0.00 - 28.6) | 0.06   | 1 (10)              | 4.1 (0.00 - 28.6)  | 0.00**  |
| Number of small ruminants in farms | < 10         | 45  | 15 (33.3)           | 1.0 (Ref.)         | 0.52   | 1 (2.2)             | 1.0 (Ref.)         | 0.56    |
|                                    | 10-30        | 131 | 53 (40.5)           | 0.83 (40.5 - 32.0) | 0.61   | 5 (3.8)             | 1.7 (0.53 - 7.1)   | 0.61    |
|                                    | > 30         | 24  | 6 (25)              | 0.69 (7.7 - 42.3)  | 0,52   | 0 (0)               | -                  | 0.46    |
| Power supply mode                  | Grazing      | 180 | 66 (36.7)           | 1.0 (Ref.)         |        | 5 (2.8)             | 1.0 (Ref.)         |         |
|                                    | Zero grazing | 20  | 8 (40)              | 1.33 (18.5 - 61.5) | 0.57   | 1 (5)               | 1.84 (0.00 - 14.6) | 0,58    |
| Watering                           | Water court  | 182 | 68 (37. 4)          | 1.0 (Ref.)         |        | 5 (2.8)             | 1.0 (Ref.)         |         |
|                                    | Well water   | 18  | 6 (33.3)            | 0.97 (11.6 - 55.1) | 0.49   | 1 (5.6)             | 2.1 (0.00 - 16.1)  | 0.50    |
| Hygiene level                      | Clean        | 48  | 12 (25)             | 1.0 (Ref.)         | 0.04*  | 2 (4.2)             | 1.0 (Ref.)         | 0.85    |
|                                    | Very clean   | 8   | 2 (25)              | 1.4 (0.00 – 55)    | 0.73   | 0 (0)               | -                  | 0.51    |
|                                    | Dirty        | 134 | 54 (40.3)           | 2.2 (32 - 48.6)    | 0.03*  | 4 (3)               | 0,71 (0.10 - 5.9)  | 0.69    |
|                                    | Very dirty   | 10  | 6 (60)              | 4.1 (29.6 - 90.4)  | 0.04*  | 0 (0)               | -                  | 0.57    |
| Presence abortions                 | Yes          | 193 | 71 (36.8)           | 1.0 (Ref.)         |        | 4 (2.1)             | 1.0 (Ref.)         |         |
|                                    | No           | 7   | 3 (42.9)            | 1.3 (6.2 - 79.5)   | 0.53   | 2 (28.6)            | 19 (0.00 - 62.0)   | 0.00**  |

Values in a column with "\*" differ significantly at  $P < 0.05$ ; "\*\*\*" differ significantly at  $P < 0.001$ ; CI= Confidence interval, N= total number of animals; n= number of positive animals; Ref: Reference category

**Table S2.** Univariate analysis of the association between risk factors and individual seropositivity to *T. gondii* and *C. abortus* infections on small ruminant farms in the northern regions of Cameroon (Adamawa, North and Far North)

| Variables            |                | N   | <i>T. gondii</i>    |                  |          | <i>C. abortus</i>   |                 |          |
|----------------------|----------------|-----|---------------------|------------------|----------|---------------------|-----------------|----------|
|                      |                |     | Prevalence<br>n (%) | OR(95 % CI)      | Pvalue   | Prevalence<br>n (%) | OR(95 % CI)     | Pvalue   |
| Région               | Adamawa        | 202 | 93 (46.1)           | 1.0 (Ref.)       | 0.0001** | 5 (2.5)             | 1.0 (Ref.)      | 0.14     |
|                      | North          | 476 | 146 (30)            | 0,51 (26.5-34.8) | 0.0001** | 18 (3.8)            | 1,5 (2.06-5.5)  | 0.39     |
|                      | Far North      | 202 | 90 (23.5)           | 0,36 (19.3-27.7) | 0.0001** | 22 (5.7)            | 2.4 (3.4-8.1)   | 0.04*    |
| Species              | Sheep          | 540 | 194 (35.9)          | 1.0 (Ref.)       |          | 25 (4.6)            | 1.0 (Ref.)      |          |
|                      | Goats          | 521 | 135 (25.9)          | 1.6 (22.1-29.7)  | 0.0001** | 20 (3.8)            | 1.2 (2.2-5.5)   | 0.71     |
| Sex                  | Female         | 775 | 263 (33.9)          | 1.0 (Ref.)       |          | 30 (3.9)            | 1.0 (Ref.)      |          |
|                      | Male           | 286 | 66 (23.1)           | 0.58 (18.2–28)   | 0.0002** | 15 (5.2)            | 1.4 (2.7-7.8)   | 0.32     |
| Age                  | < 5 month      | 46  | 14 (30.4)           | 1.0 (Ref.)       | 0.0002** | 3 (6.5)             | 1.0 (Ref.)      | 0.60     |
|                      | [6-12 month[   | 229 | 53 (23.1)           | 0.72 (17.7-28.6) | 0.34     | 7 (3.1)             | 0.45 (0.82-5.3) | 0.25     |
|                      | [1-3 years [   | 502 | 143 (28.5)          | 0,96 (24.7-32.6) | 0.91     | 24 (4.8)            | 0.72 (2.9-6.7)  | 0.60     |
|                      | [3-5 years]    | 284 | 119 (41.9)          | 1.6 (36.2-47.6)  | 0.04*    | 11 (3.9)            | 0.58 (1.6-6.1)  | 0.41     |
| Physiological status | Pregnant       | 291 | 111 (38.1)          | 1.0 (Ref.)       |          | 11 (3.8)            | 1.0 (Ref.)      |          |
|                      | Non-Pregnant   | 484 | 152 (31.4)          | 0.73 (27.3-35.5) | 0.04*    | 19 (3.9)            | 1.1 (2.2-5.7)   | 0.91     |
| Breed                | Sahelian goat  | 3   | 0 (0.00)            | 1.0 (Ref.)       | 0.01*    | 1 (33.3)            | 1.0 (Ref.)      | 0.0001** |
|                      | Djallonke goat | 409 | 103 (25.2)          | 0.10 (21-29.4)   | 0.30     | 16 (3.9)            | 0.08 (2.0-5.8)  | 0.01*    |
|                      | Djallonké      | 322 | 114 (35.4)          | 0.16 (30.2-40.6) | 0.19     | 4 (1.2)             | 0.03 (0.03-2.5) | 0.0001** |
|                      | Sheep          | 104 | 32 (30.8)           | 0,13 (21.9-39.6) | 0.24     | 3 (2.9)             | 0.06 (0.00-6.1) | 0.006**  |
|                      | Kirdi          | 11  | 1 (9.1)             | 0.03 (0.00-26.1) | 0.59     | 0 (0.00)            | -               | 0.04*    |
|                      | Fat tail sheep | 206 | 79 (38.4)           | 0.18 (31.7-45)   | 0.16     | 21 (10.2)           | 0.23 (6.1-14.3) | 0.19     |
|                      | Oudah          | 6   | 0 (0.00)            | -                | -        | 0 (0.00)            | -               | -        |

Values in a column with "\*" differ significantly at  $P < 0.05$ ; "\*\*\*" differ significantly at  $P < 0.001$ ; CI= Confidence interval, N= total number of animal, n= number of positive animals; Ref: Reference category
